# Supplementary material
Source: publisher site journal article supplement (https://neobiota.pensoft.net/article/67950/download/suppl/33/)
Supplement: Supplementary file 1

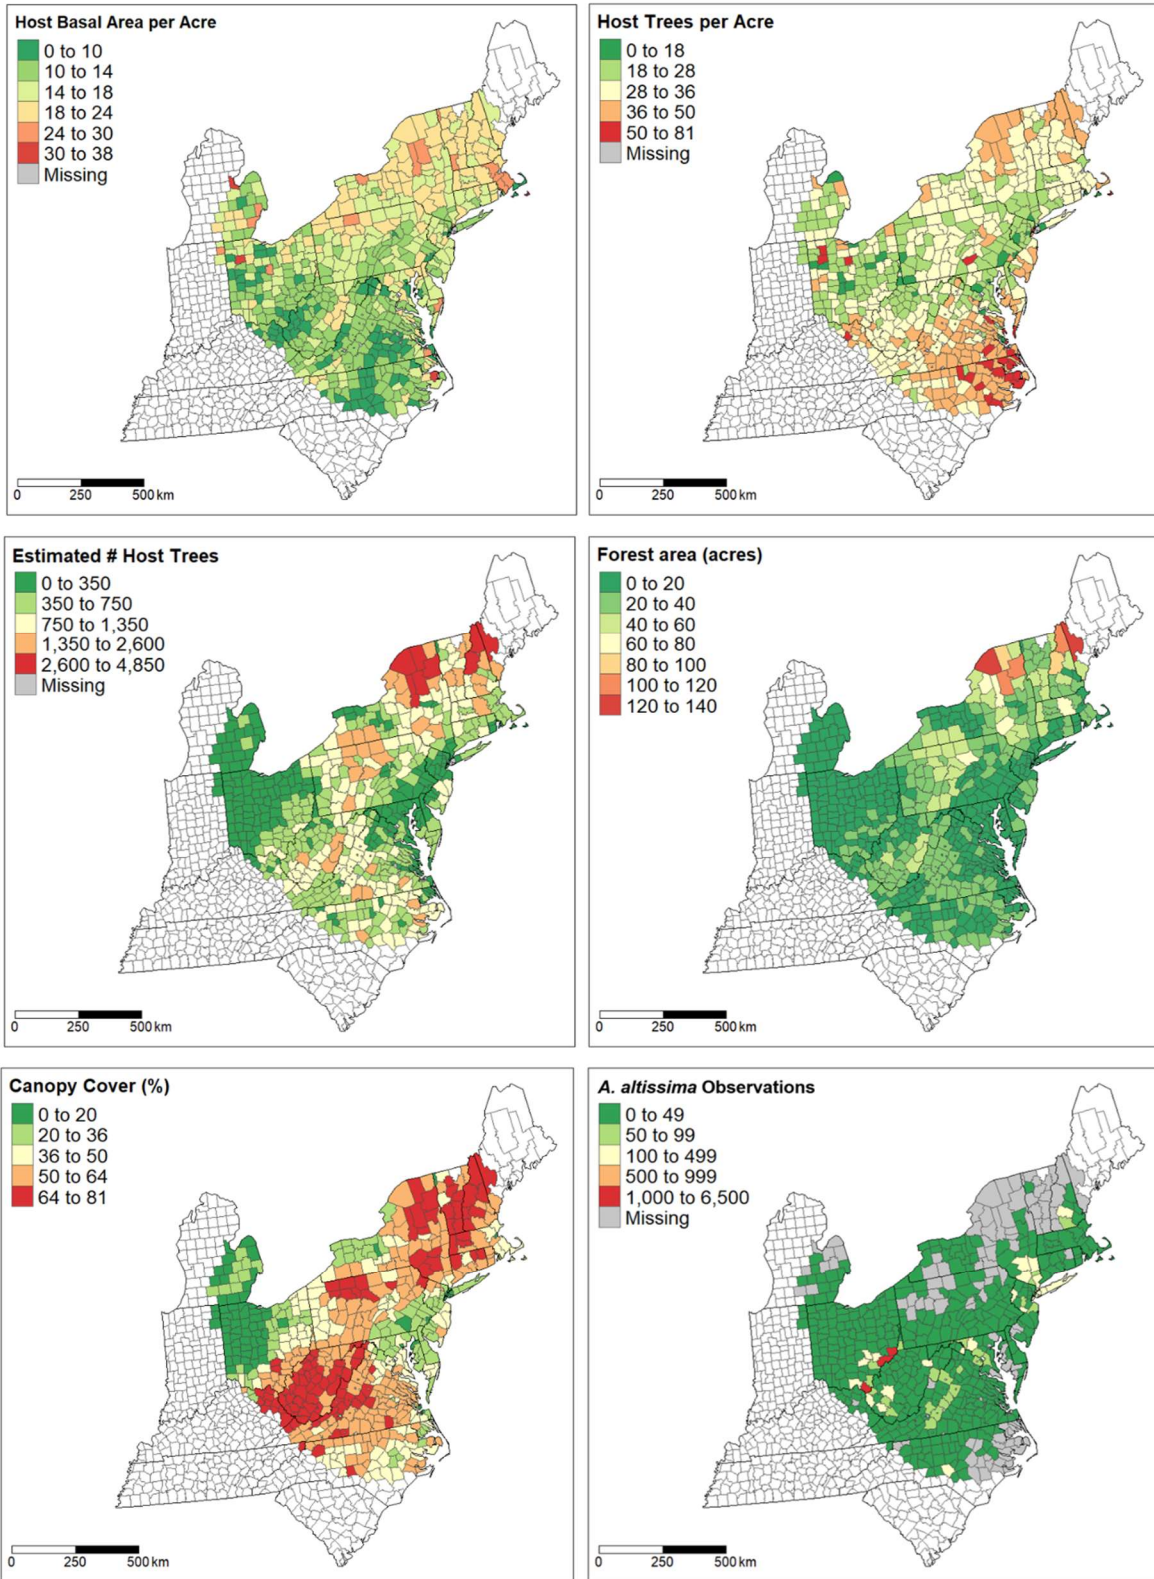

**Figure S3. Habitat predictor variable distributions.** Distributions of habitat predictor variables used in Cox proportional hazards model development.
